# Supplementary material for: Implementation of a Practical Teaching Course on Protein Engineering
Source: MDPI journal article supplement (doi:10.3390/biology11030387), 2022-03-01
Supplement: s1 [file s1]

## Supplementary Material

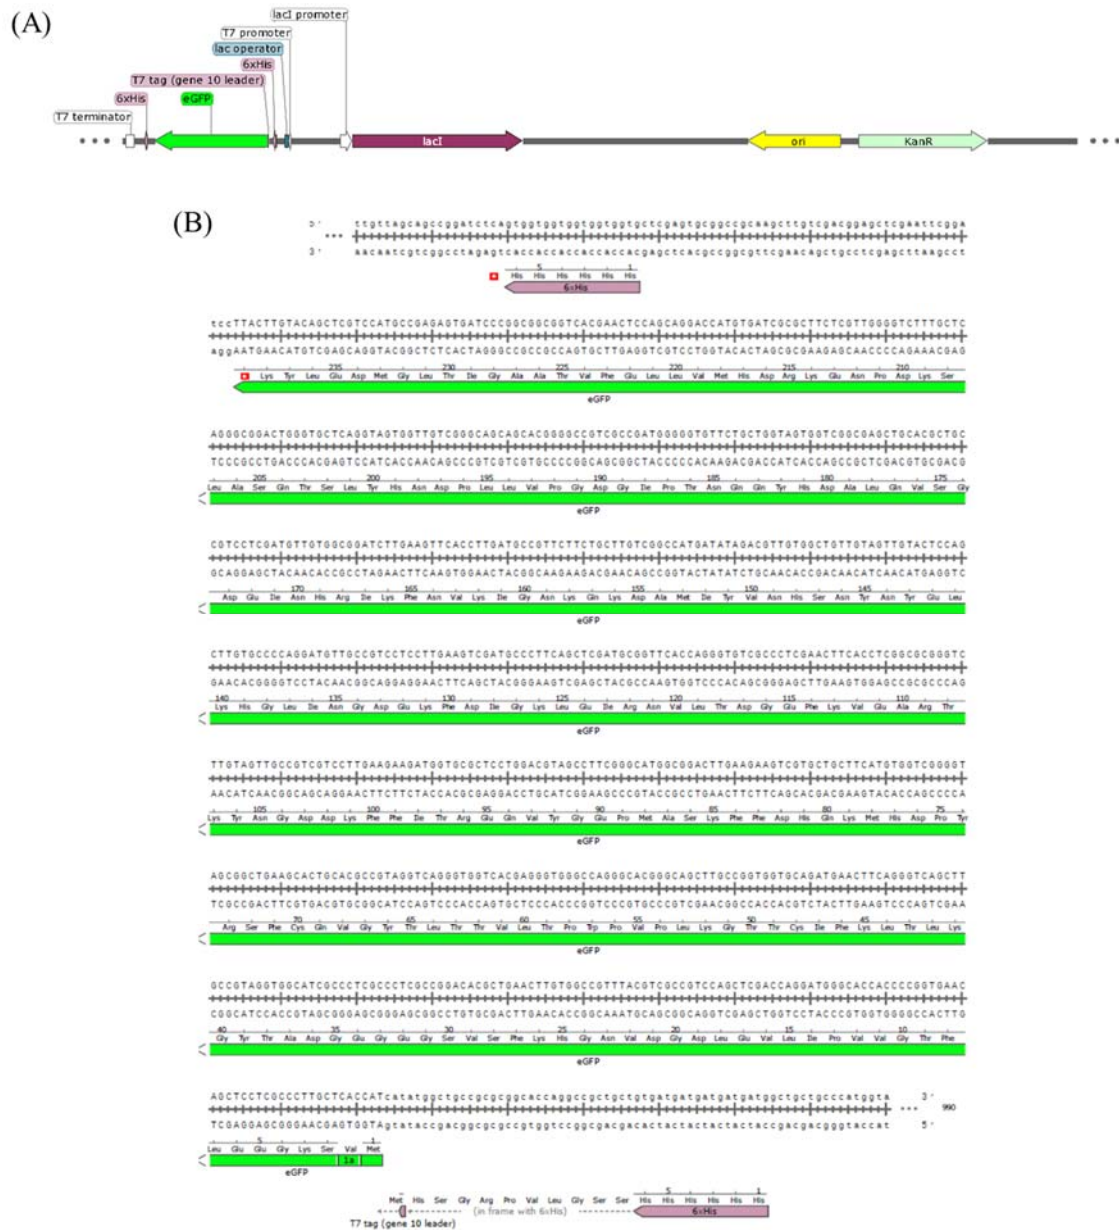

Figure S1. (A) Linear map of plasmid pFM23 showing in detail the (B) His-tag location and protein domain organization.

### Session 1 - Bacterial growth curve and chemical induction

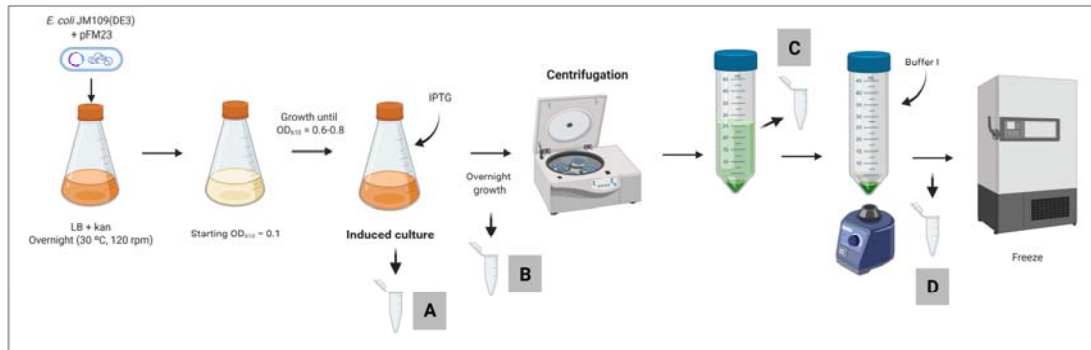

### Session 2 - Cell disruption and contact with the chromatographic resin

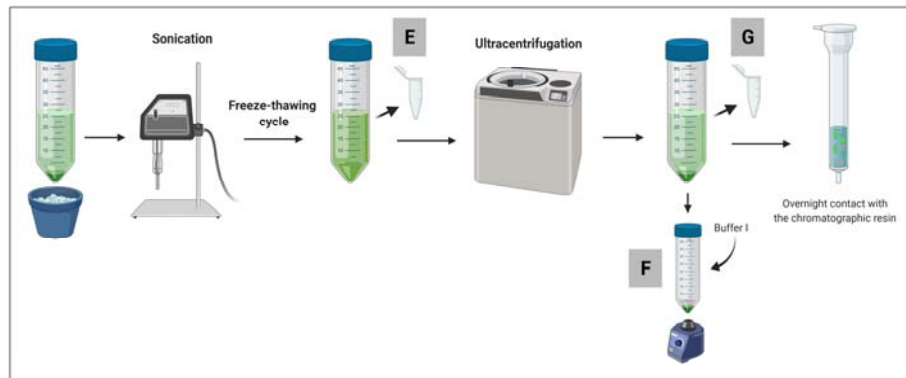

### Session 3 - Affinity chromatography and dialysis

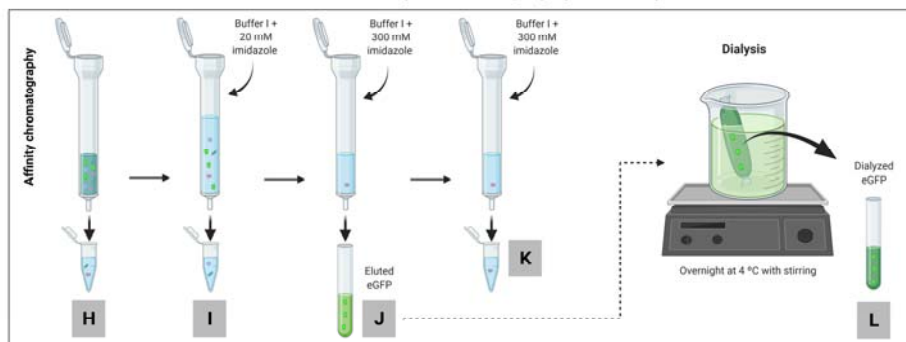

### Session 4 - Total protein concentration

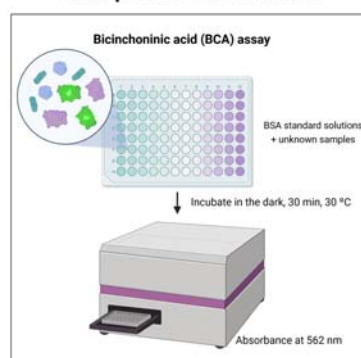

### Session 5 - SDS-PAGE

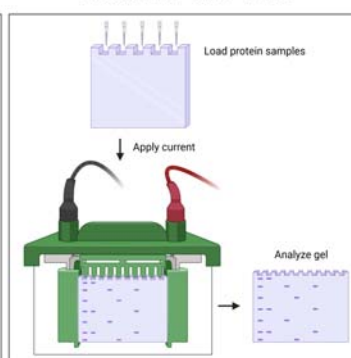

### Session 6 - eGFP concentration

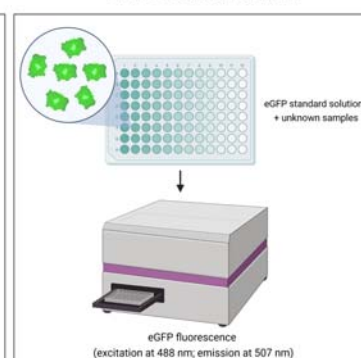

Figure S2. Summary scheme of tasks to be performed in each lab section. Special emphasis was placed on the samples to be kept, properly identified with a letter from A to L, for further analysis in Sessions 4, 5 and 6.

Table S1. List of reagents used for preparing an SDS-PAGE gel with a concentration of 15% in acrylamide

| Reagents*                | Separating gel | Stacking gel |
|--------------------------|----------------|--------------|
| 40% acrylamide           | 5.63 mL        | 1.28 mL      |
| 2% bisacrylamide         | 0.65 mL        | 0.7 mL       |
| 1 M Tris-HCl pH 8.7      | 5.6 mL         | -            |
| 1 M Tris-HCl pH 6.9      | -              | 1.25 mL      |
| 10% SDS                  | 150 $\mu$ L    | 100 $\mu$ L  |
| H <sub>2</sub> O         | 1.1 mL         | 6.77 mL      |
| TEMED                    | 10 $\mu$ L     | 25 $\mu$ L   |
| 10% Ammonium persulphate | 50 $\mu$ L     | 50 $\mu$ L   |

\* All the reagents were added except TEMED and ammonium persulphate that were only mixed when all the gel apparatus was ready to cast the gel.

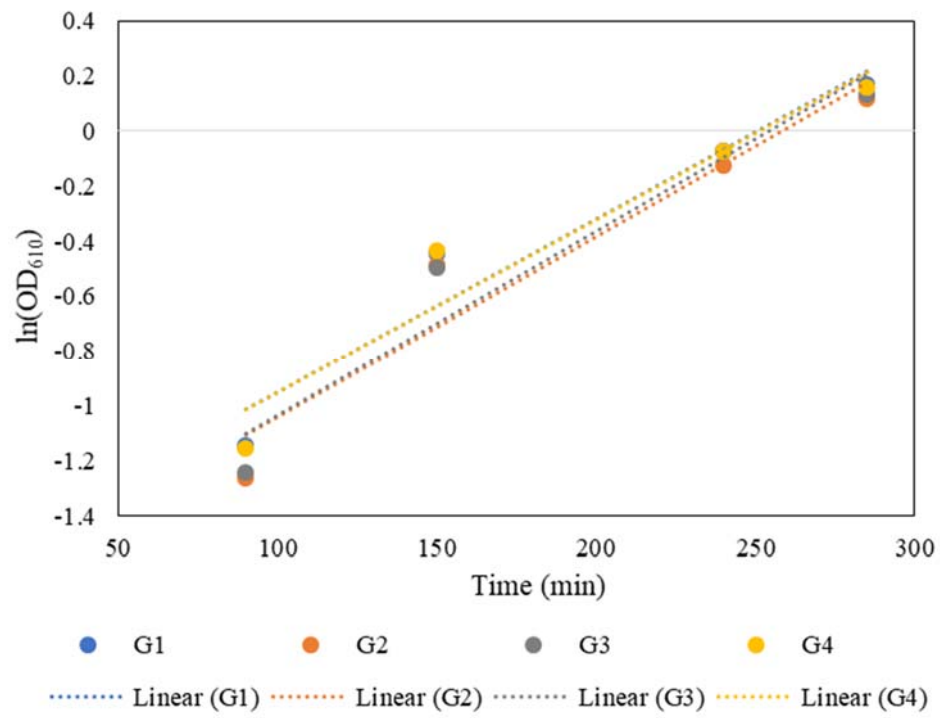

Figure S3. Logarithmic representation of the growth curves shown in Figure 3 to estimate the growth kinetics parameters ( $\mu_{max}$  and  $t_d$ ).

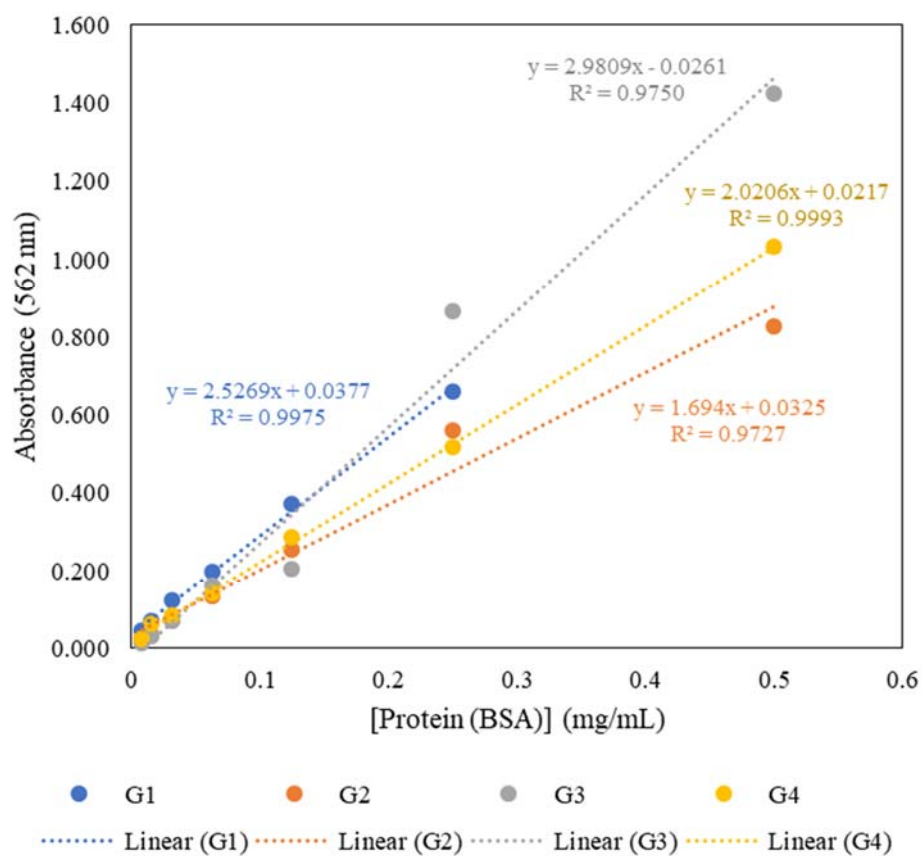

Figure S4. Comparison of the calibration curves obtained by the working groups (G1, G2, G3 and G4) for the bicinchoninic acid (BCA) assay.

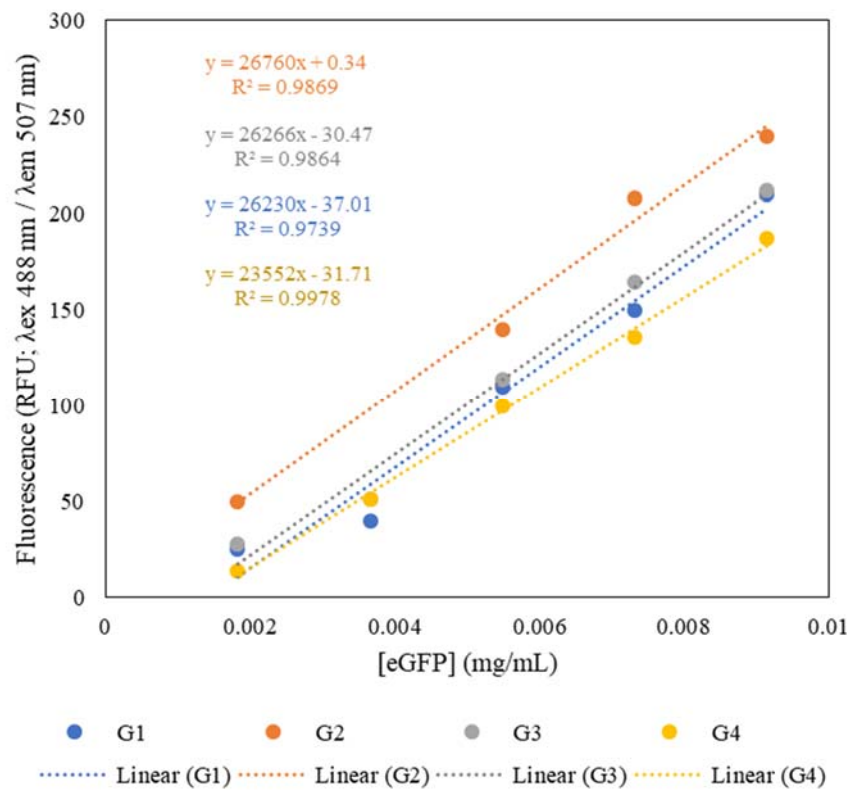

Figure S5. Comparison of the calibration curves obtained by the working groups (G1, G2, G3 and G4) for eGFP quantification.
